# Supplementary material for: PItcHPERFeCT: Primary Intracranial Hemorrhage Probability Estimation using Random Forests on CT
Source: PubMed Central journal article supplement — Neuroimage Clin. 2017 Feb 15;14:379–90. doi: 10.1016/j.nicl.2017.02.007 (PMC5328741; doi:10.1016/j.nicl.2017.02.007), 2017-02-15
Supplement: mmc1.pdf [file mmc1.pdf]

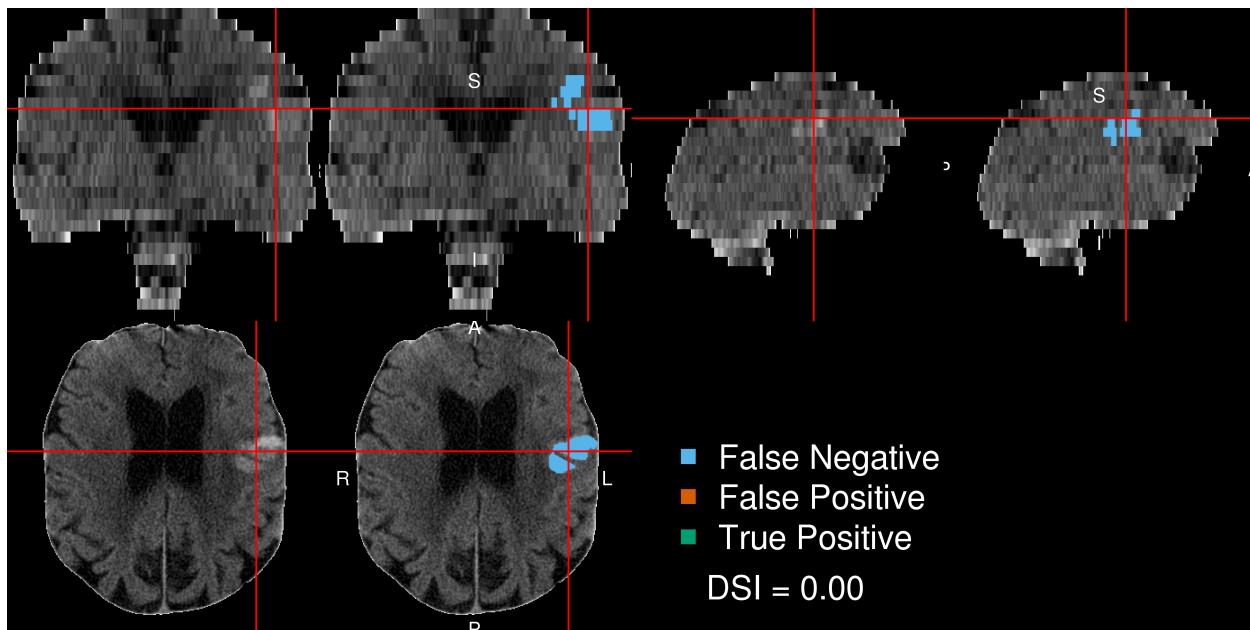

Figure S1: **Patient with Lowest Dice Similarity Index.** We present the patient with the lowest Dice Similarity Index (DSI), a measure of spatial overlap, from the chosen predictor model fit with a random forest. The lowest DSI was 0. The green indicates a correct classification of ICH from the model, blue indicates a false negative, where the manual segmentation denoted the area to be ICH but the predicted one did not, and red indicates a false positive, where the predicted segmentation denoted the area to be ICH but the manual one did not.

## 5. Supplemental Material

### 5.1. Examples of Dice Similarity Index in Test Scans

### 5.2. Model Specification

Let  $Y_i(v)$  represent the binary hemorrhage mask indicator for voxel  $v$ , from patient  $i$ , and  $x_{i,v}(k)$  represent the predictor image for image  $j$ ,  $j = 1, \dots, 21$ .

$$\text{logit}(P(Y_i(v) = 1)) = \beta_0 + \sum_{j=1}^{21} x_{i,j}(v)\beta_j$$

The coefficients for the logistic model are (in log odds or log odds ratios):

The specification for the functional form of the model fit with the LASSO penalty, is the same, but optimizes the following criteria ([https://web.stanford.edu/~hastie/glmnet/glmnet\\_alpha.html#log](https://web.stanford.edu/~hastie/glmnet/glmnet_alpha.html#log)):

$$\min_{\beta} - \left( \frac{1}{\sum_i V_i} \sum_i Y_i(v) \times X_i(v)\beta - \log(1 + e^{X_i(v)\beta}) \right) + \lambda \sum_k |\beta_k|$$

### 5.3. Variable Importance Plot

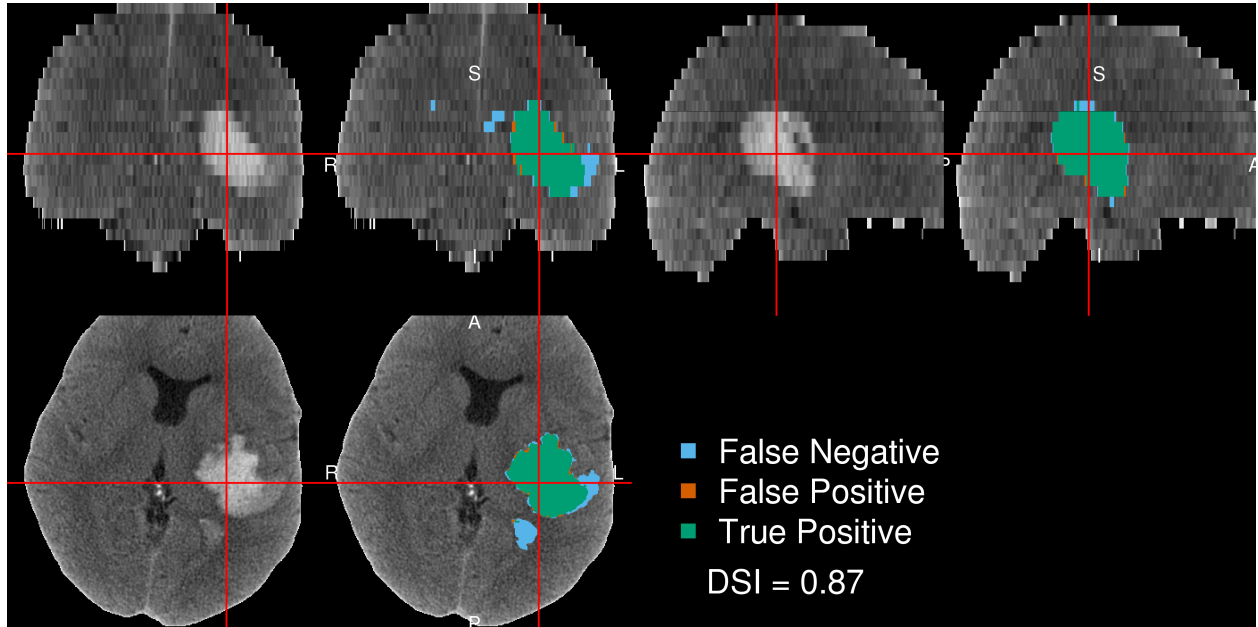

Figure S2: **Patient with 25<sup>th</sup> Quantile Dice Similarity Index.** We present the patient with the 25<sup>th</sup> quantile Dice Similarity Index (DSI), a measure of spatial overlap, from the chosen predictor model fit with a random forest. The 25<sup>th</sup> quantile DSI was 0.87. The green indicates a correct classification of ICH from the model, blue indicates a false negative, where the manual segmentation denoted the area to be ICH but the predicted one did not, and red indicates a false positive, where the predicted segmentation denoted the area to be ICH but the manual one did not.

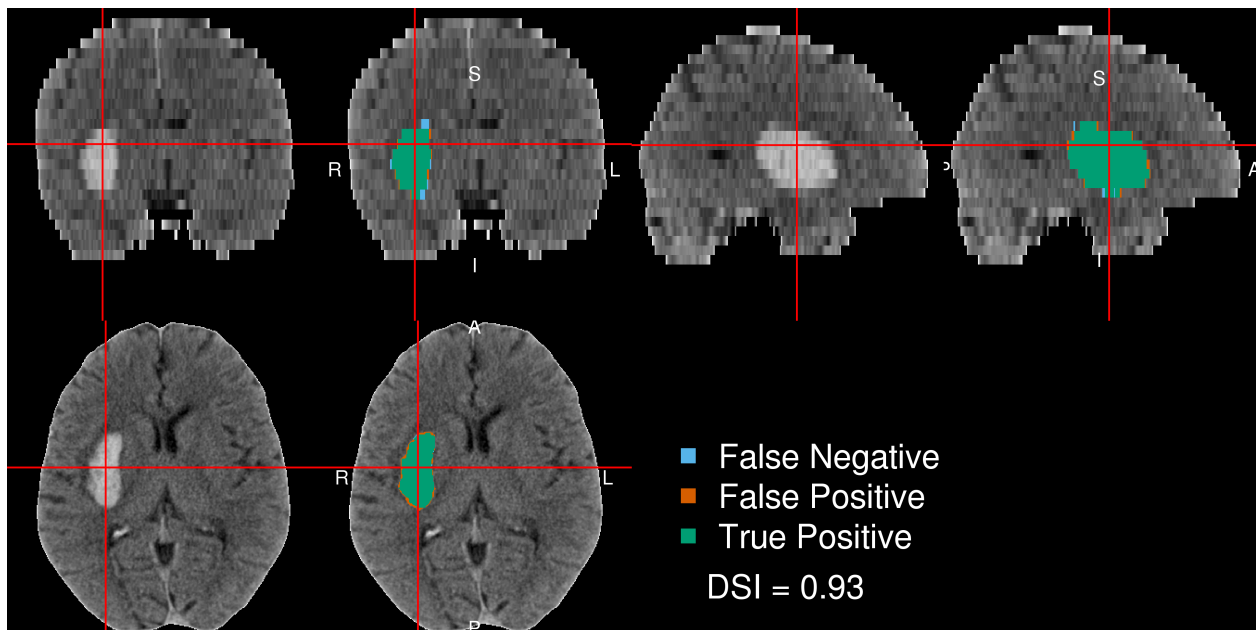

Figure S3: **Patient with 75<sup>th</sup> Quantile Dice Similarity Index.** We present the patient with the 75<sup>th</sup> quantile Dice Similarity Index (DSI), a measure of spatial overlap, from the chosen predictor model fit with a random forest. The 75<sup>th</sup> quantile DSI was 0.93. The green indicates a correct classification of ICH from the model, blue indicates a false negative, where the manual segmentation denoted the area to be ICH but the predicted one did not, and red indicates a false positive, where the predicted segmentation denoted the area to be ICH but the manual one did not.

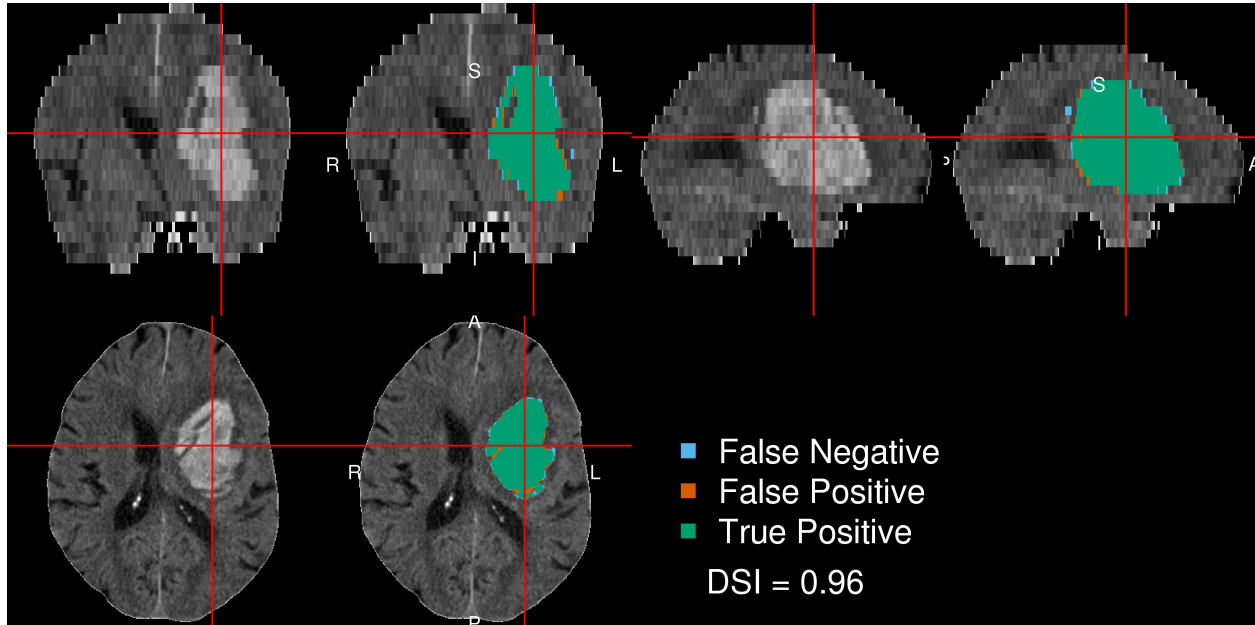

Figure S4: **Patient with Highest Dice Similarity Index.** We present the patient with the highest Dice Similarity Index (DSI), a measure of spatial overlap, from the chosen predictor model fit with a random forest. The highest DSI was 0.96. The green indicates a correct classification of ICH from the model, blue indicates a false negative, where the manual segmentation denoted the area to be ICH but the predicted one did not, and red indicates a false positive, where the predicted segmentation denoted the area to be ICH but the manual one did not.

| Predictor                                    | Beta   | SE    | Z       |
|----------------------------------------------|--------|-------|---------|
| Intercept                                    | 1.008  | 0.331 | 3.046   |
| Neighborhood mean                            | 0.051  | 0.010 | 4.964   |
| Neighborhood sd                              | 0.000  | 0.000 | 0.304   |
| Neighborhood skew                            | 0.065  | 0.046 | 1.415   |
| Neighborhood kurtosis                        | -0.352 | 0.026 | -13.357 |
| Image intensity (HU)                         | -0.172 | 0.012 | -14.741 |
| Threshold ( $\geq 40$ and $\leq 80$ )        | -0.151 | 0.072 | -2.090  |
| Within-plane coronal                         | -0.632 | 0.050 | -12.537 |
| Within-plane sagittal                        | -0.249 | 0.057 | -4.381  |
| Within-plane axial                           | 1.037  | 0.056 | 18.354  |
| Winsorized standardized (20% trim)           | 0.547  | 0.041 | 13.518  |
| Percentage thresholded neighbors             | 2.061  | 0.172 | 11.955  |
| Atropos probability image                    | 0.150  | 0.092 | 1.635   |
| Percent of zero neighbors                    | -9.180 | 1.437 | -6.387  |
| Indicator of any zero neighbors              | 0.071  | 0.345 | 0.205   |
| Distance to image centroid                   | -0.087 | 0.002 | -45.265 |
| Gaussian smooth ( $\sigma = 5\text{mm}^3$ )  | -0.051 | 0.014 | -3.591  |
| Gaussian smooth ( $\sigma = 10\text{mm}^3$ ) | 0.550  | 0.022 | 25.416  |
| Gaussian smooth ( $\sigma = 20\text{mm}^3$ ) | -0.390 | 0.020 | -19.757 |
| Standardized-to-template intensity           | 1.460  | 0.034 | 43.100  |
| Contralateral difference                     | 0.033  | 0.002 | 17.530  |

Table 1: Beta coefficients (log odds ratio) for the logistic regression model for all coefficients. Combining these for each voxel value and using the inverse logit transformation yields the probability that voxel is ICH. After smoothing by 1 voxel in all 3 directions, the probability cutoff for thresholding was 0.5481. We note the standardized-to-template intensity and the neighborhood mean appear to be the strongest predictors.

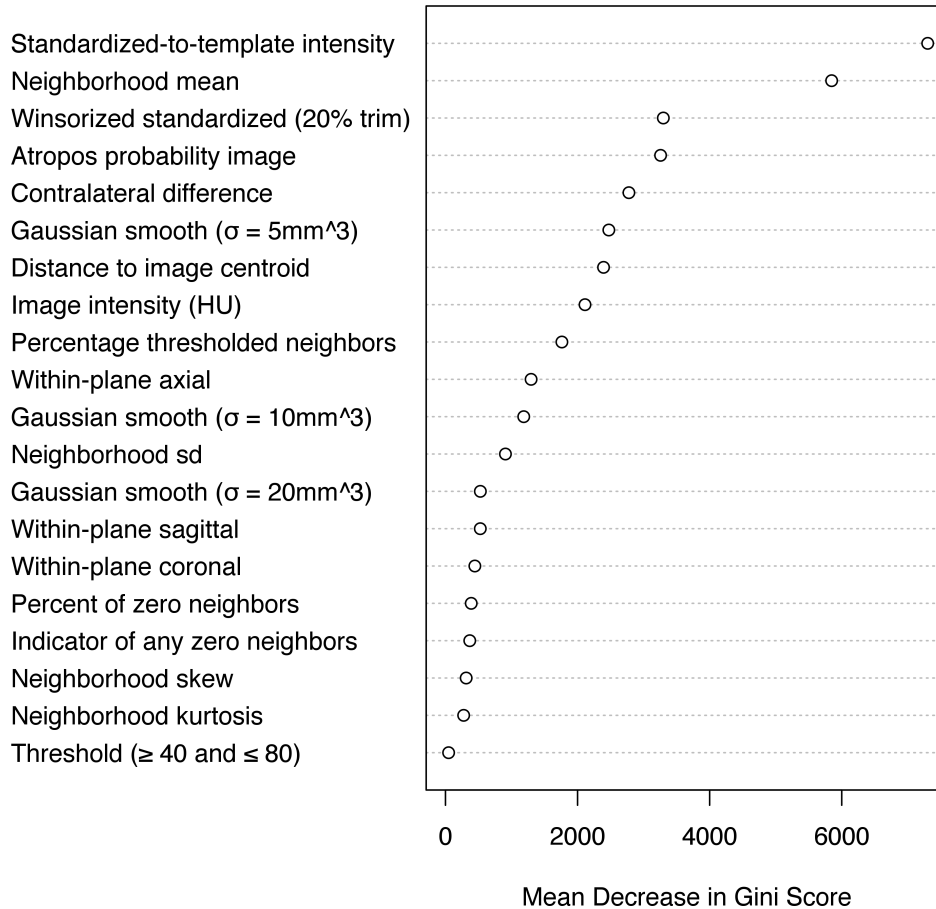

Figure S5: **Variable Importance Plot of Random Forest Classifier.** These numbers represent the mean decrease in the Gini coefficient in the random forest classifier for all coefficients. After smoothing by 1 voxel in all 3 directions, the probability cutoff for thresholding with this classifier was 0.509.

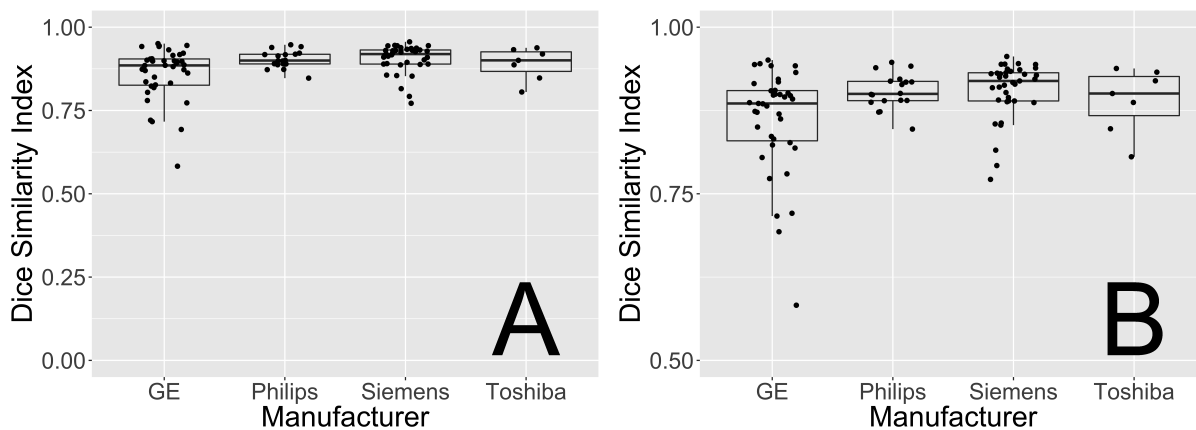

Figure S6: **Dice Similarity Index (DSI) by CT Scanner Manufacturer.** Here we present the DSI for all patients in the test set for the different scanner manufacturers (panel A). We note that the failed segmentation was a patient scanned with a GE scanner. We present the same data in panel B without that patient to illustrate the distributions of the DSI by scanner (note the y-axis begins at 0.5 DSI). All median DSI is relatively high. We see the lowest median DSI for patients scanned in GE scanners, comparable median DSI for Toshiba and Philips, slightly higher DSI for those scanned in a Siemens machine.

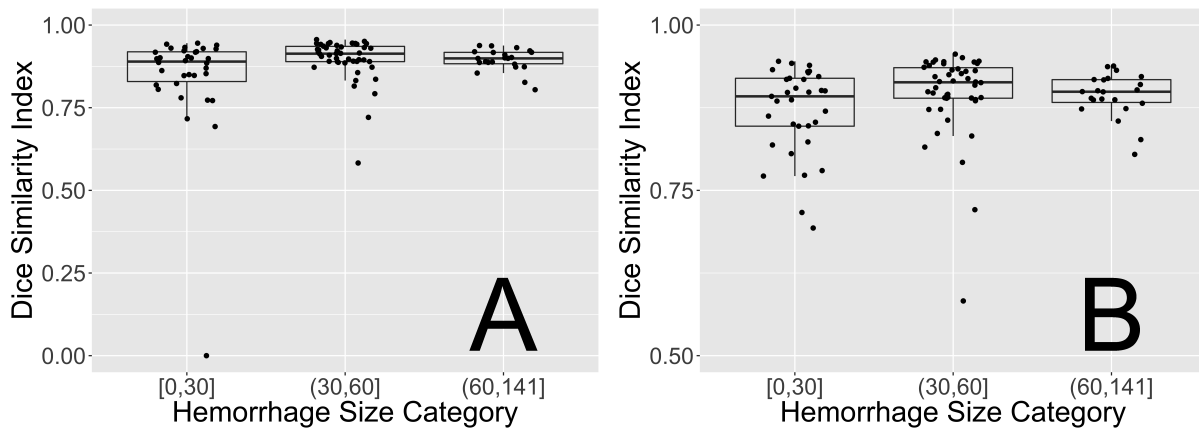

Figure S7: **Dice Similarity Index (DSI) by Hemorrhage Volume Category.** Here we present the DSI for all patients in the test set for the different hemorrhage voxel categories, described above (panel A). We will denote the categories as small, medium and large. We note that the failed segmentation was in the small category. We present the same data in panel B without that patient to illustrate the distributions of the DSI by category (note the y-axis begins at 0.5 DSI). All median DSI is relatively high. We see the lowest median DSI for patients with small hemorrhages, followed by large hemorrhages, and the highest median DSI is in the medium hemorrhages.
